# Supplementary material
Source: MDPI journal article supplement (https://www.mdpi.com/2297-8739/10/2/107)
Supplement: s1 [file s1]

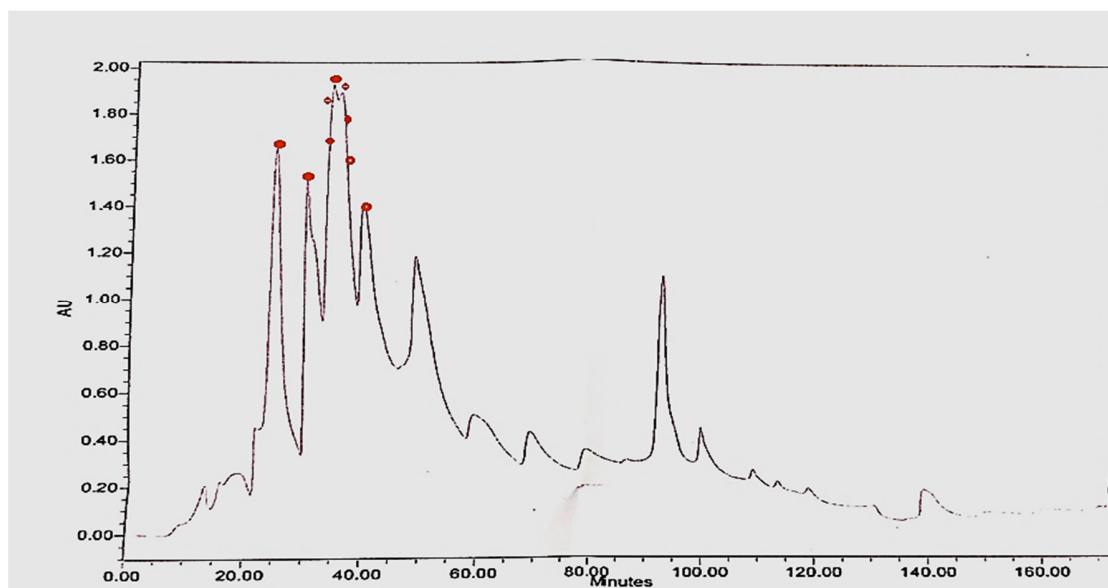

**Figure S1.** Absorption spectra from column chromatography at wavelength of 254-280nm. Red spot indicates active peaks.

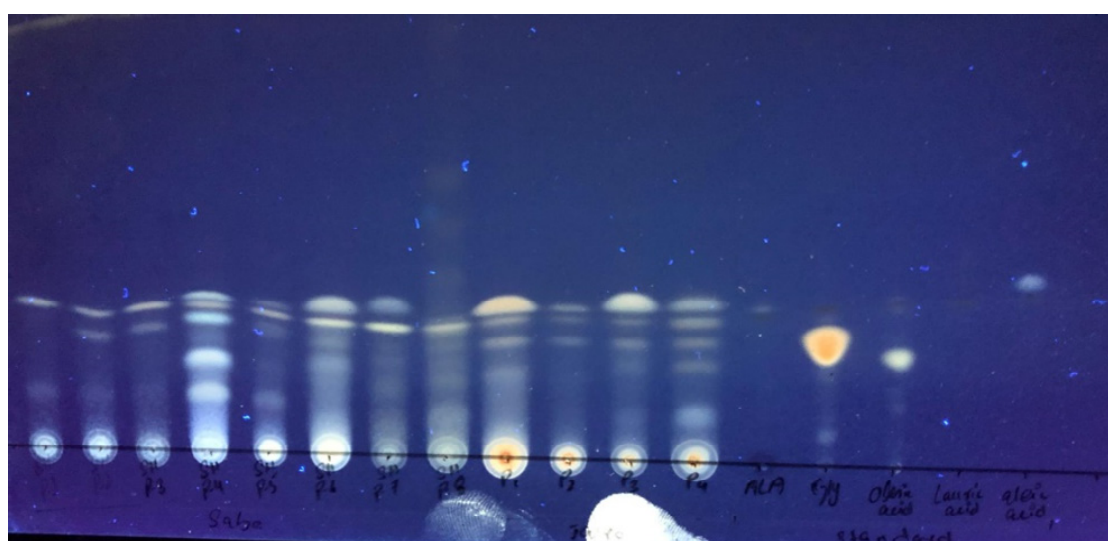

**Figure S2.** TLC separation and identification of active peaks.

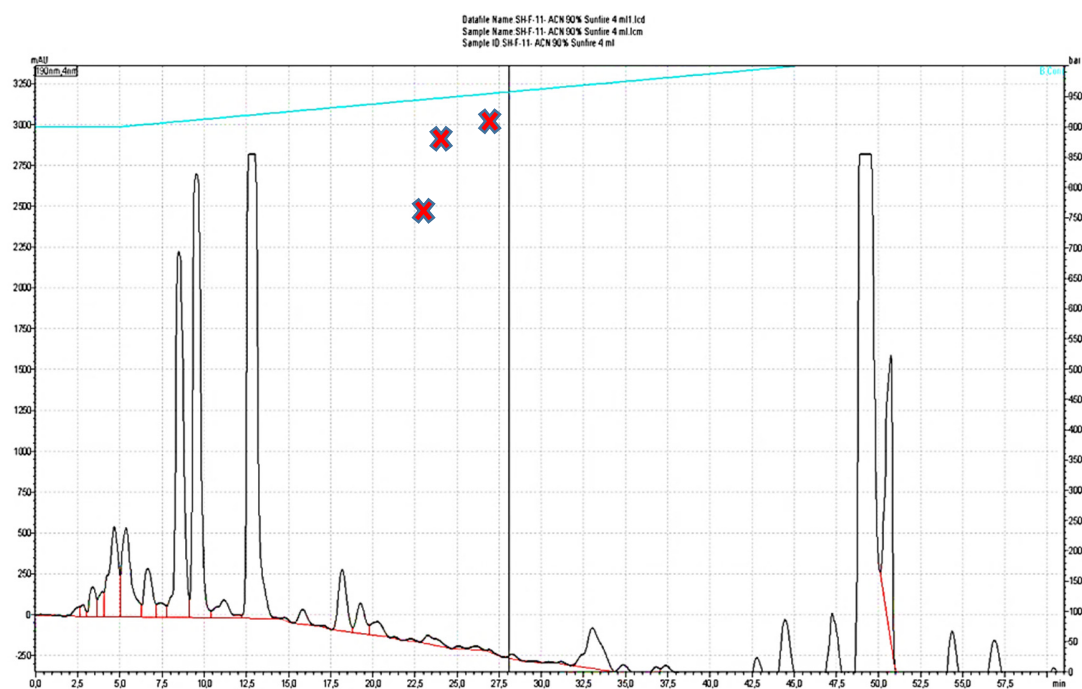

**Figure S3.** HPLC-DAD absorption spectra of fraction11, area with Red Cross are active peaks.
